# Supplementary material for: Excellent Oxygen Evolution Reaction of Activated Carbon-Anchored NiO Nanotablets Prepared by Green Routes
Source: MDPI journal article supplement (doi:10.3390/nano10071382), 2020-07-15
Supplement: s1 [file s1]

# Excellent Oxygen Evolution Reaction of Activated Carbon-Anchored NiO Nanotablets Prepared by Green Routes

Sankar Sekar <sup>1,2</sup>, Deuk Young Kim <sup>1,2</sup> and Sejoon Lee <sup>1,2,\*</sup>

<sup>1</sup> Division of Physics & Semiconductor Science, Dongguk University-Seoul, Seoul 04620, Korea; sanssekar@gmail.com (S.S.); dykim@dongguk.edu (D.Y.K.)

<sup>2</sup> Quantum-functional Semiconductor Research Center, Dongguk University-Seoul, Seoul 04620, Korea

\* Correspondence: sejoon@dongguk.edu; Tel.: +82-2-2260-3946

## Morphological Properties of Biomass-AC

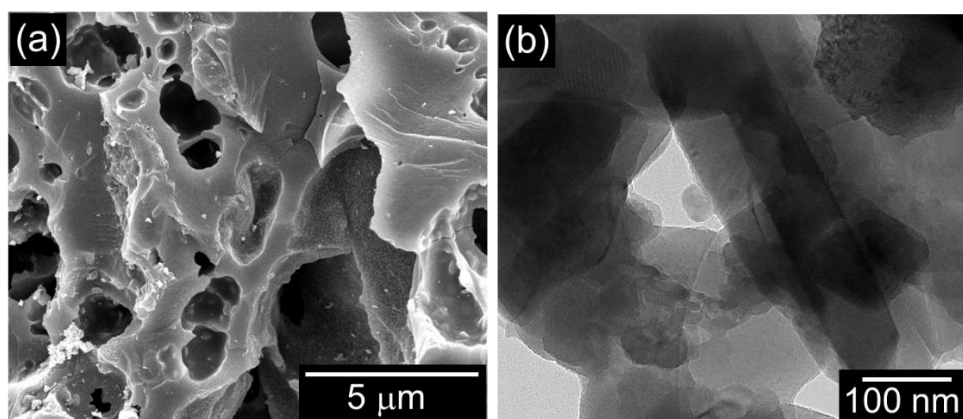

Figure S1. (a) FE-SEM and (b) TEM image of the AC nanosponges.

## Structural Properties of Biomass-AC

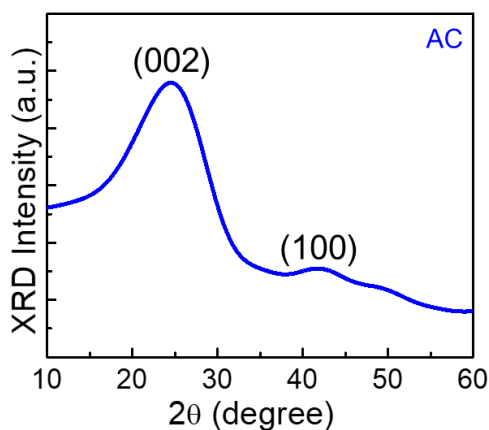

Figure S2. XRD pattern of the AC nanosponges.

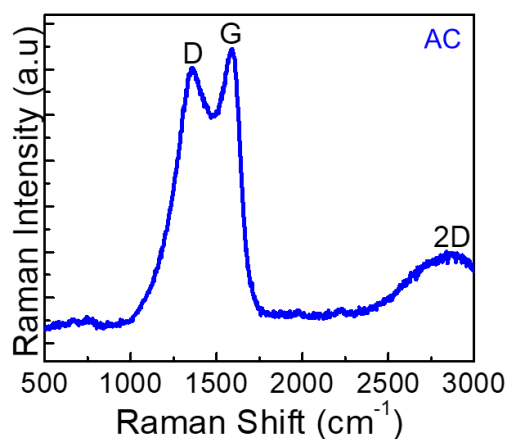

Figure S3. Raman spectra of AC nanosponges.

### Electrocatalytic Properties of NiO and AC-NiO

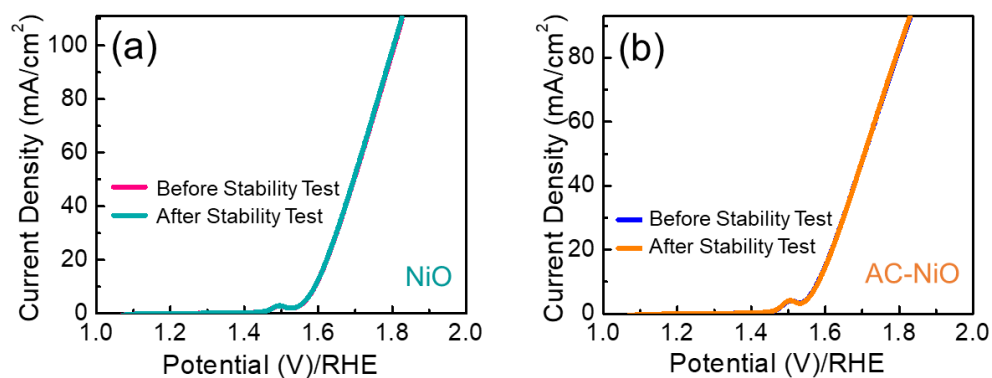

Figure S4. LSV curves of (a) NiO and (b) AC-NiO electrodes for OER before and after the stability test.

### Morphological Properties of NiO and AC-NiO Electrodes After Stability Test

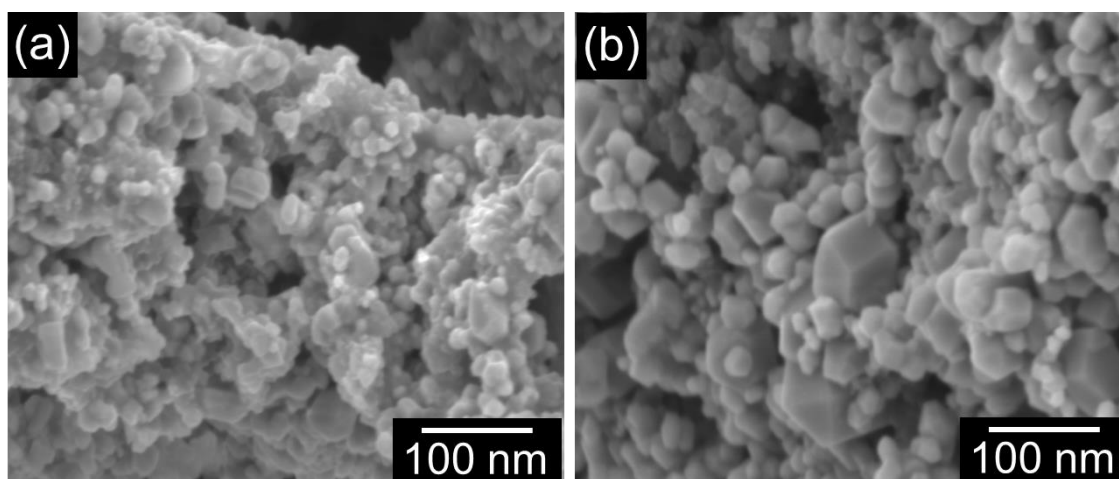

Figure 5S. FE-SEM images of (a) NiO and (b) AC-NiO after the stability test.

## Structural Properties of NiO and AC-NiO Electrodes After Stability Test

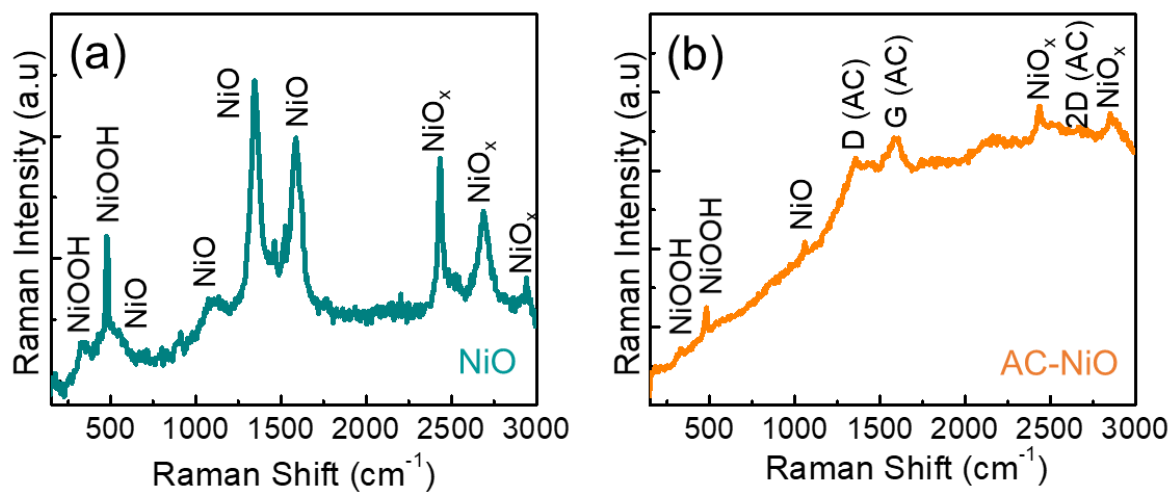

Figure S6. Raman spectra of (a) NiO and (b) AC-NiO after the stability test.
